# Supplementary material for: Testing the Efficacy of the Synthesis of Iron Antimony Sulfide Powders from Single Source Precursors
Source: MDPI journal article supplement (doi:10.3390/inorganics9080061), 2021-08-02
Supplement: s1 [file s1]

# Testing the Efficacy of the Synthesis of Iron Antimony Sulfide Powders from Single Source Precursors

Fadiyah Makin<sup>1</sup>, Dalal Alzahrani<sup>2</sup>, Firoz Alam<sup>3</sup>, Floriana Tuna<sup>2</sup>, and David J. Lewis<sup>1,\*</sup>

<sup>1</sup> Department of Materials, The University of Manchester, Oxford Road, Manchester M13 9PL, UK; fadiyah.makin@postgrad.manchester.ac.uk

<sup>2</sup> Photon Science Institute, The University of Manchester, Oxford Road, Manchester M13 9PL, UK; dalal.alzahrani@postgrad.manchester.ac.uk (D.A.); Floriana.Tuna@manchester.ac.uk (F.T.)

<sup>3</sup> Department of Chemistry, The University of Manchester, Oxford Road, Manchester M13 9PL, UK; firoz.alam@manchester.ac.uk

\* Correspondence: david.lewis-4@manchester.ac.uk

**Table S1.** Composition used for the synthesis of  $\text{Sb}_{2(1-x)}\text{Fe}_{2x}\text{S}_3$  system.

| Mole fraction<br>[Fe]/[Fe]+[Sb] | $\text{Fe}[\text{S}_2\text{CNEt}_2]_3$ | $\text{Sb}[\text{S}_2\text{CNEt}_2]_3$ |
|---------------------------------|----------------------------------------|----------------------------------------|
| 0                               | 0 mmol                                 | 0.40 mmol                              |
| 0.2                             | 0.40 mmol                              | 1.6 mmol                               |
| 0.4                             | 0.40 mmol                              | 0.60 mmol                              |
| 0.6                             | 0.40 mmol                              | 0.26 mmol                              |
| 0.8                             | 0.40 mmol                              | 0.10 mmol                              |
| 1                               | 0.40 mmol                              | 0 mmol                                 |

## Binary systems: $\text{Sb}_2\text{S}_3$ and $\text{Fe}_x\text{S}_y$

The thermal decomposition of precursor **(1)** and **(2)** synthesised at temperature 300, 400, 425, 450 and 475 for 1h resulted in a black residue which was analysed by P-XRD. P-XRD patterns of the nanocrystals resulted from  $\text{Sb}[\text{S}_2\text{CN}(\text{Et}_2)]_3$  (**1**) at 400, 425, 450 and 475 °C are illustrated in Figure S1. The analysis revealed that the crystalline phase produced corresponded to orthorhombic stibnite ( $\text{Sb}_2\text{S}_3$ , ICDD: 01-073-0393) with lattice parameters  $a = 11.313 \text{ \AA}$ ,  $b = 3.833 \text{ \AA}$ , and  $c = 11.225 \text{ \AA}$ . As shown in Figure S1, the intensities of peaks were similar in all cases with a slight increase in some of the peaks upon increase in the growth temperature.

P-XRD patterns of the nanoparticles resulting from decomposition of  $[\text{Fe}(\text{S}_2\text{CN}(\text{Et}_2)_2)]_3$  (**2**) at 300, 400, 450 and 475 °C are illustrated in Figure S2. The diffraction peaks corresponded to a hexagonal pyrrhotite iron sulfide ( $\text{Fe}_{0.95}\text{S}_{1.05}$ , ICDD 01-075-0600) with lattice parameters  $a = 3.4303 \text{ \AA}$ ,  $b = 3.4303 \text{ \AA}$ , and  $c = 5.6802 \text{ \AA}$  with major diffraction peaks corresponding to (100), (101), (102), (110) planes. There were no significant differences in the intensities of peaks of all four samples.

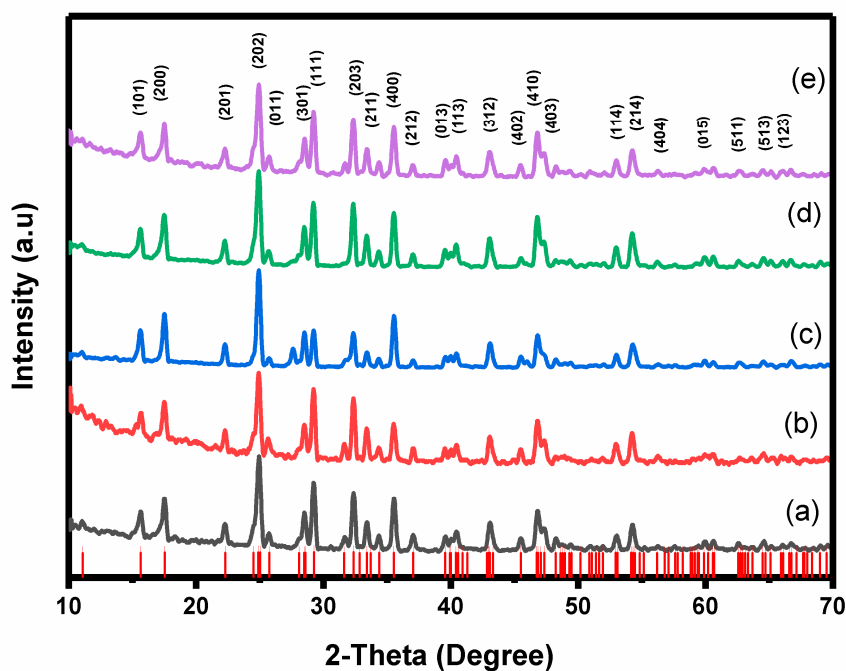

**Figure S1.** P-XRD patterns of  $\text{Sb}_2\text{S}_3$  nanoparticles at (a) 300, (b) 400, (c) 425, (d) 450 and (e) 475 °C deposited from decomposition of  $\text{Sb}(\text{S}_2\text{CN}(\text{Et})_2)_3$  using melt method for 1h. All peaks corresponded to standard pattern of stibnite (ICDD 01-073-0393).

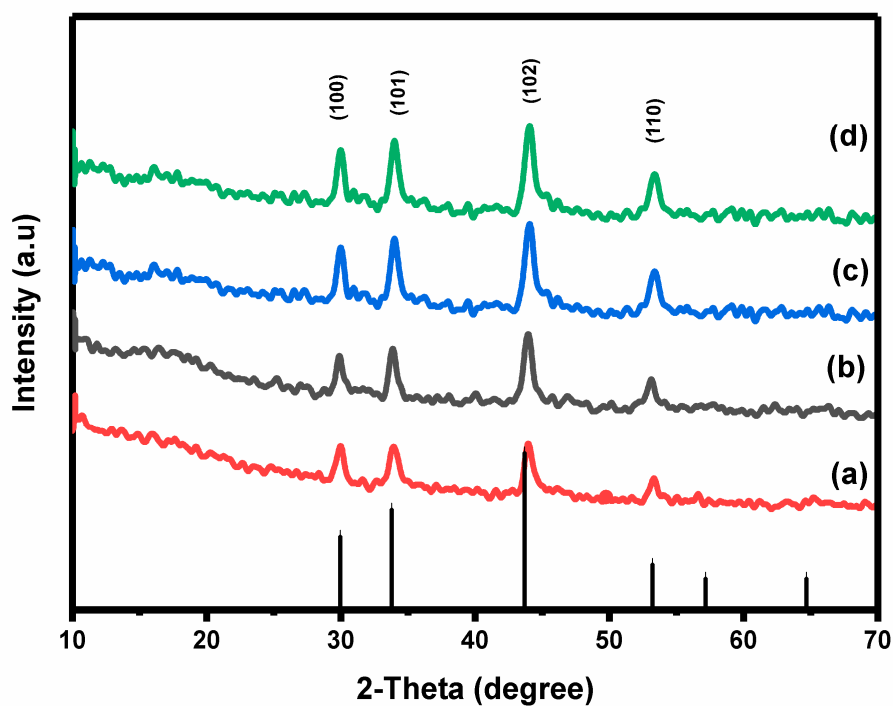

**Figure S2.** P-XRD patterns of  $\text{FeS}$  nanoparticles at (a) 300 °C, (b) 400 °C (c) 450 °C and (d) 475 °C from decomposition of  $\text{Fe}(\text{S}_2\text{CN}(\text{Et})_2)_3$  using melt method for 1h. All peaks corresponded to standard pattern of pyrrhotite (ICDD 01-075-0600).

**Table S2.** The content of Fe, Sb and S in  $\text{Sb}_{2(1-x)}\text{Fe}_x\text{S}_3$  prepared by melt method at 450°C ( $x = 0, 0.2, 0.4, 0.6, 0.8$  and 1 molar fraction of iron) calculated from the feed rate and found by EDX measurement.

| Mole Fraction | Elemental Composition Required (Atomic %) |    |    | Stoichiometry Required                     | Elemental Composition Found by EDX (atomic %) |       |       | Stoichiometry Found By EDX                       |
|---------------|-------------------------------------------|----|----|--------------------------------------------|-----------------------------------------------|-------|-------|--------------------------------------------------|
|               | Fe                                        | Sb | S  |                                            | Fe                                            | Sb    | S     |                                                  |
| 0             | 0                                         | 40 | 60 | $\text{Sb}_2\text{S}_3$                    | 0                                             | 38.0  | 62.0  | $\text{Sb}_{1.9}\text{S}_{3.1}$                  |
| 0.2           | 8                                         | 32 | 60 | $\text{Fe}_{0.4}\text{Sb}_{1.6}\text{S}_3$ | 9.1                                           | 32.7  | 58.2  | $\text{Fe}_{0.4}\text{Sb}_{1.6}\text{S}_{2.9}$   |
| 0.4           | 16                                        | 24 | 60 | $\text{Fe}_{0.8}\text{Sb}_{1.2}\text{S}_3$ | 17.9                                          | 26.9  | 55.2  | $\text{Fe}_{0.8}\text{Sb}_{1.3}\text{S}_{2.75}$  |
| 0.6           | 24                                        | 16 | 60 | $\text{Fe}_{1.2}\text{Sb}_{0.8}\text{S}_3$ | 23.5                                          | 18.9  | 57.9  | $\text{Fe}_{1.15}\text{Sb}_{0.9}\text{S}_{2.85}$ |
| 0.8           | 32                                        | 8  | 60 | $\text{Fe}_{1.6}\text{Sb}_{0.4}\text{S}_3$ | 32.98                                         | 21.76 | 45.27 | $\text{Fe}_{1.6}\text{Sb}_{1.08}\text{S}_{2.2}$  |
| 1             | 40                                        | 0  | 60 | $\text{Fe}_2\text{S}_3$                    | 45.0                                          | 0     | 55.0  | $\text{Fe}_{1.09}\text{S}_{0.9}$                 |

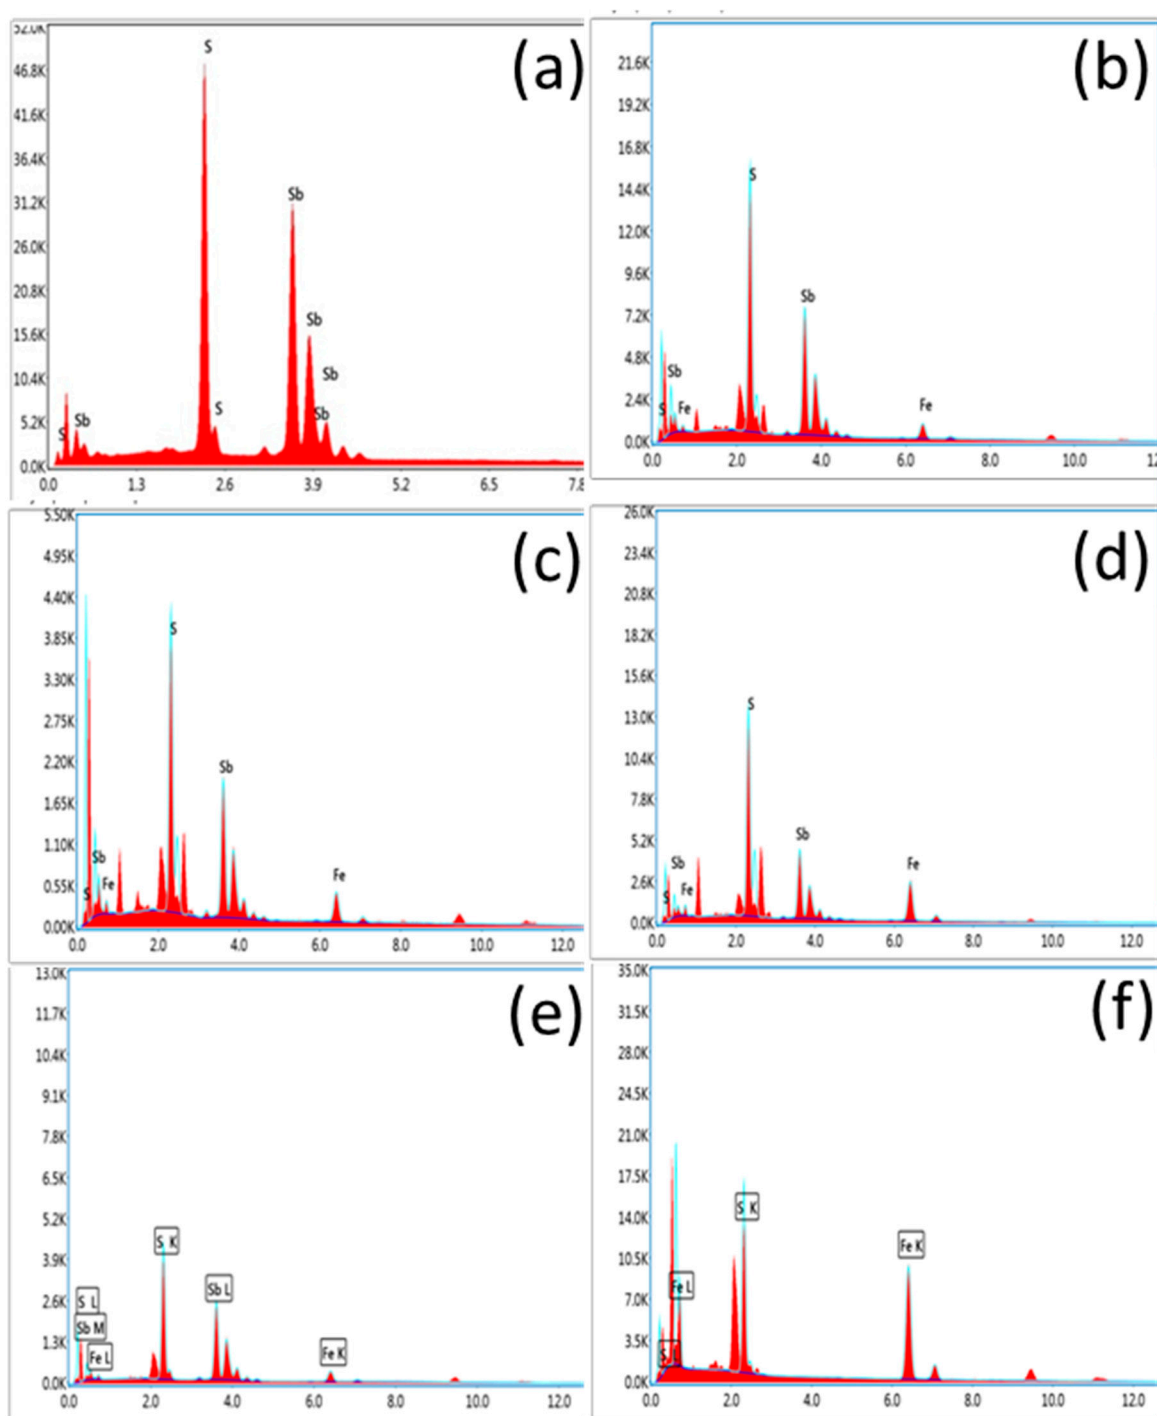

**Figure S3.** The EDX spectra of  $\text{Sb}_{2(1-x)}\text{Fe}_{2x}\text{S}_3$  samples prepared by melt method at 450 °C at various Iron mole fraction (a)  $x = 0$ , (b)  $x = 0.2$ , (c)  $x = 0.4$ , (d)  $x = 0.6$ , (e)  $x = 0.8$  and (f)  $x = 1$ .

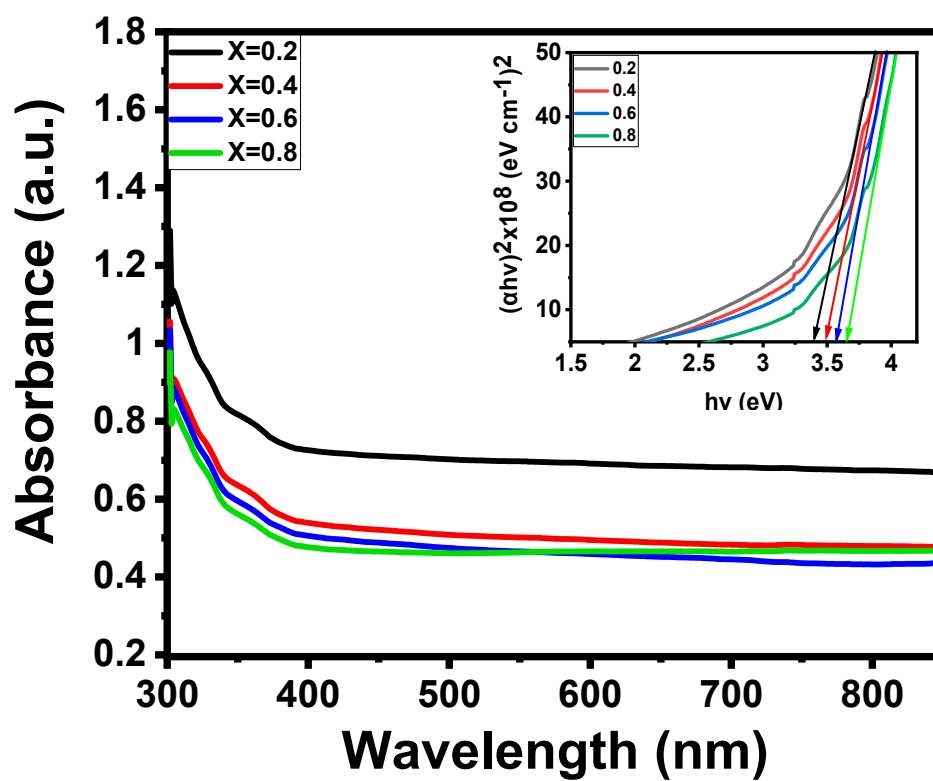

**Figure S4.** Absorption spectra of  $\text{Sb}_{2(1-x)}\text{Fe}_{2x}\text{S}_3$  and inset the tauc plot of  $\text{Sb}_{2(1-x)}\text{Fe}_{2x}\text{S}_3$  samples prepared by melt method at 450 °C at various Iron mole fraction  $x = 0.2, 0.4, 0.6$ , and  $0.8$ .
